# Supplementary material for: Fundamentals of Li/CFxbattery design and application
Source: Royal Society of Chemistry journal article supplement (doi:10.1039/d2ee04179k), 2023-01-01
Supplement: d2ee04179k1.pdf [file d2ee04179k1.pdf]

## Supporting Information

### Fundamentals of Li/CF<sub>x</sub> battery design and application

Shixue Zhang,<sup>a</sup> Lingchen Kong,<sup>b</sup> Yu Li,<sup>a</sup> Cong Peng\*<sup>a</sup> and Wei Feng\*<sup>ab</sup>

a. Institute of Advanced Technology and Equipment, Beijing University of Chemical Technology, 100029, Beijing, China. cpeng@buct.edu.cn

b. School of Materials Science and Engineering and Tianjin Key Laboratory of Composite and Functional Materials, Tianjin University, 300072, Tianjin, China.  
 E-mail: weifeng@tju.edu.cn

In simple terms, the carbon source can affect the skeleton structure of its derivatives, which is important for conductivity; moreover, the defects of carbon increase reactivity and influence the fluorination degree and the strength of C–F bonds, which relate to the capacity and discharge voltage, respectively.

Since the fluorination progresses inwardly, the fluorine pattern of formed CF<sub>x</sub> is co-determined by the structure of the carbon and mechanism of F diffusion, which is under control of the fluorination method and condition. For the convenience of readers, we summarize the synthesis and properties of different types of fluorinated carbons in detail here.

Table S1 Detailed fluorocarbon synthesis and performance.

| No. | CF <sub>x</sub>    | Typical synthesis              |                                 | structure |                     | performance      |                             |                       | Ref. |
|-----|--------------------|--------------------------------|---------------------------------|-----------|---------------------|------------------|-----------------------------|-----------------------|------|
|     |                    | Carbon source                  | Fluorination method             | F/C       | % sp <sup>2</sup> C | Capacity (mAh/g) | E <sub>1/2</sub> Voltage(V) | Current               |      |
| 1   | F-graphite         | nature graphite                | Direct fluorination, 390°C      | 0.61      |                     | 670              | 2.35                        | 0.5mA/cm <sup>2</sup> | 1    |
| 2   |                    |                                | Direct fluorination, 594°C      | 1         |                     | 820              | 2.09                        |                       |      |
| 3   |                    |                                | Catalytic fluorination (RT)     | 0.65      |                     | ~650             | ~3.08                       |                       | 2    |
| 4   |                    |                                |                                 | 1         |                     | ~660             | ~2.4                        |                       |      |
| 5   |                    |                                | Mechanochemical fluorination    | 0.62      |                     | 500              | ~3.0                        | 25 mA/g               | 3    |
| 6   |                    | nanographite                   | Direct fluorination, 300°C      | 0.67      |                     | ~800             | 2.83                        | 10 mA/g               | 4    |
| 7   |                    |                                | Direct fluorination, 400°C      | 0.82      |                     | ~805             | 2.65                        |                       |      |
| 8   |                    |                                | Direct fluorination, 450°C      | 0.89      |                     | 837.4            | 2.54                        |                       |      |
| 9   |                    | Defective graphite             | Catalytic fluorination (RT)     | 0.58      |                     | 940              | 3.1                         | 5.1 mA/g              | 5    |
| 10  | F-graphene         | graphene                       | Direct fluorination, 300 °C     | 0.67      | 7.5                 | 632              | 2.35                        | 10 mA/g               | 6    |
| 11  |                    | graphene oxide                 | Solvothermal fluorination 180°C | 0.476     |                     |                  |                             |                       | 7    |
| 12  | F-amorphous carbon | Ketjenblack                    | controlled fluorination 520°C   | 0.95      |                     | ~770             | ~2.8                        | 0.1C                  | 8    |
| 13  | F-hard carbon      | calcinated macadamia nut shell | Direct fluorination, 250°C      | 1.1       | 12.11               | 898              | 3.05                        | 10 mA/g               | 9    |
| 14  |                    |                                | Direct fluorination, 280°C      | 1.12      | 10.47               | 949              | 2.97                        |                       |      |
| 15  |                    | hard carbon                    | Direct fluorination,            | 1.03      | 20.45               | 774.7            | ~2.55                       | 0.1C                  | 10   |

| No. | CF <sub>x</sub>    | Typical synthesis         |                               | structure |                     | performance      |                             |         | Ref.     |
|-----|--------------------|---------------------------|-------------------------------|-----------|---------------------|------------------|-----------------------------|---------|----------|
|     |                    | Carbon source             | Fluorination method           | F/C       | % sp <sup>2</sup> C | Capacity (mAh/g) | E <sub>1/2</sub> Voltage(V) | Current |          |
|     |                    | (purchased)               | 390°C                         |           |                     |                  |                             |         |          |
| 16  | F-carbon nanofibre | carbon nanofibre          | Direct fluorination, 428°C    | 0.59      |                     | 600              | 2.44                        | 10 mA/g | 11<br>12 |
| 17  |                    |                           | controlled fluorination 450°C | 0.56      | 46                  | 613              | 2.34                        |         |          |
| 18  |                    |                           | Direct fluorination, 435°C    | 0.68      |                     | 510              | 2.27                        |         |          |
| 19  |                    |                           | controlled fluorination 480°C | 0.7       | 35                  | 614              | 2.32                        |         |          |
| 20  | F-carbon nanotube  | carbon nanotubes          | Direct fluorination, 350°C    | 0.74      | 8.9                 | 640.76           | ~2.56                       | 0.1 C   | 13       |
| 21  |                    |                           | Direct fluorination, 400°C    | 1.28      | 6.4                 | 705.02           | ~2.51                       |         |          |
| 22  |                    |                           | Direct fluorination, 500°C    | 1.89      | 0.6                 | 794.85           | ~2.26                       |         |          |
| 23  |                    |                           | Direct fluorination, 525°C    | 2.11      | 0.5                 | 727.2            | ~2.3                        | 0.1 C   |          |
| 24  |                    |                           | Direct fluorination, 380°C    | 1         | 10.5                | ~695             | ~2.32                       |         |          |
| 25  |                    |                           | Direct fluorination, 450°C    | 0.98      | /                   | ~790             | ~2.25                       |         |          |
| 26  |                    | plasma fluorination 300°C | 1.14                          | 7.46      | 819.3               | ~2.6             | 100mA/g                     | 15      |          |
| 27  | F-carbon nanocage  | Carbon Nanocages          | plasma fluorination           | 0.98      |                     | 850              | ~2.4                        | 100mA/g | 16       |

Several comparisons are conducted below to facilitate understanding.

Comparing fluorinated graphite and fluorinated hard carbon in line No.1 and No.15 of Table S1, they both fluorinated at 390°C by direct fluorination, while they have different F/C ratio as 0.61 and 1.03, respectively. Because the hard carbon is rich in defects which makes it easier to be fluorinated.

Comparing the fluorinated carbon nanofibers in line No.18 and No.19, the same carbon nanofibers are fluorinated by different methods, and different temperatures are demanded to obtain similar F/C ratio. The fluorinated carbon nanofibers exhibit considerable difference performance, indicating that fluorination method impact on the microstructure of formed CF<sub>x</sub>.

Comparing the fluorinated carbon nanotubes in line No.20-23, the carbon nanotubes are all fluorinated by direct fluorination, while the structure of fluorinated carbon nanotubes can be various because of the temperature difference. As a result, the visible structure difference leads to a considerable difference in batteries performance.

Table S2 Different fluorination methods and characteristics

| Fluorination methods         | Typical fluorinating agents                                                                                      | Advantages                                                        | Disadvantages                                                     | Ref.  |
|------------------------------|------------------------------------------------------------------------------------------------------------------|-------------------------------------------------------------------|-------------------------------------------------------------------|-------|
| direct fluorination          | F <sub>2</sub> gas/F <sub>2</sub> -containing gas mixtures                                                       | suitable for large-scale synthesis                                | fluorination is uneven and damage the skeleton (high temperature) | 17-21 |
| controlled fluorination      | TbF <sub>4</sub> , XeF <sub>2</sub> and NF <sub>3</sub>                                                          | dispersion of F is homogenous throughout the carbon matrix        | fluorinating agent cost is high                                   | 22-27 |
| catalytic fluorination       | MF <sub>n</sub> (IF <sub>5</sub> , BF <sub>3</sub> , ClF <sub>3</sub> , AlF <sub>3</sub> , MgF <sub>2</sub> )-HF | low temperature, CF <sub>x</sub> contains non-fluorinated domains | subsequent high temperature treatment is needed                   | 28-32 |
| plasma fluorination          | CF <sub>4</sub> , SF <sub>6</sub>                                                                                | suitable for surface fluorination                                 | F/C ratio is relatively low                                       | 33-35 |
| solvochemical fluorination   | HF                                                                                                               | low temperature, convenient                                       | only oxygen-rich carbon sources are recommended                   | 36    |
| mechanochemical fluorination | CoF <sub>3</sub>                                                                                                 | room temperature fluorination                                     | high-energy milling is needed                                     | 37    |

|                              |                |                                                  |                      |    |
|------------------------------|----------------|--------------------------------------------------|----------------------|----|
| electrochemical fluorination | HF electrolyte | room temperature fluorination and easily control | F content is limited | 38 |
|------------------------------|----------------|--------------------------------------------------|----------------------|----|

## References

- N. Watanabe, R. Hagiwara, T. Nakajima, H. Touhara and K. Ueno, *Electrochim. Acta*, 1982, **27**, 1615-1619.
- A. Hamwi, M. Daoud and J. C. Cousseins, *Synthetic Metals*, 1989, **30**, 23-31.
- Jeffrey A. Read and Wishvender K. Behl, *Electrochemical and Solid-State Letters*, 2009, **12**, A16-A18.
- L. Wang, Y. Li, S. Wang, P. Zhou, Z. Zhao, X. Li, J. Zhou and S. Zhuo, *ChemElectroChem*, 2019, **6**, 2201-2207.
- Y. Matsuo, J. Inamoto, H. Yamamoto, K. Matsumoto and R. Hagiwara, *Electrochemistry*, 2020, **88**, 437-440.
- X. Bi, Y. Li, Z. Qiu, C. Liu, T. Zhou, S. Zhuo and J. Zhou, *Materials*, 2018, **11**, 1072.
- Z. Wang, J. Wang, Z. Li, P. Gong, X. Liu, L. Zhang, J. Ren, H. Wang and S. Yang, *Carbon*, 2012, **50**, 5403-5410.
- Z. C. Liu, J. Lu and P. Huang, *Advanced Materials Research*, 2014, **968**, 16 - 20.
- C. Peng, Y. Li, F. Yao, H. Fu, R. Zhou, Y. Feng and W. Feng, *Carbon*, 2019, **153**, 783-791.
- R. Zhou, Y. Li, Y. Feng, C. Peng and W. Feng, *Composites Communications*, 2020, **21**, 100396.
- Z. Wei, K. Guérin, M. Dubois, H. Axel, F. Masin and A. Hamwi, *Carbon*, 2008, **46**, 1017-1024.
- W. Zhang, K. Guérin, M. Dubois, Z. Fawal, D. Ivanov, L. Vidal and A. Hamwi, *Carbon*, 2008, **46**, 1010-1016.
- J. Hou, X. Yang, X. Fu, D. Zou, J. Ma, Y. Peng, Y. Liu and X. Jian, *Journal of Alloys and Compounds*, 2022, **923**.
- Y. Li, Y. Feng and W. Feng, *Electrochimica Acta*, 2013, **107**, 343-349.
- L. S. Yao, H. P. Zhou, G. T. Chen, S. Zhang, T. T. Feng, Z. Q. Xu, Z. X. Fang, H. M. Zhang, L. Zhang and M. Q. Wu, *Diamond and Related Materials*, 2023, **131**.
- A. V. Sosunov, D. A. Ziolkowska, R. S. Ponomarev, V. K. Henner, B. Karki, N. Smith, G. Sumanasekera and J. B. Jasinski, *New J. Chem.*, 2019, **43**, 12892-12895.
- X. Bi, Y. Li, Z. Qiu, C. Liu, T. Zhou, S. Zhuo and J. Zhou, *Materials*, 2018, **11**, 1072.
- W. Lai, X. Wang, J. Fu, T. Chen, K. Fan and X. Liu, *Carbon*, 2018, **137**, 451-457.
- S. Rehman, M. Pope, S. Tao and E. McCalla, *Energy & Environmental Science*, 2022, **15**, 1423-1460.
- M. Pouzet, D. Gautier, K. Charlet, M. Dubois and A. Béakou, *Appl. Surf. Sci.*, 2015, **353**, 1234-1241.
- Y. Ahmad, S. Berthon-Fabry, M. Chatenet, G. Monier, M. Dubois and K. Guerin, *J. Fluorine Chem.*, 2020, **238**, 109633.
- W. Zhang, K. Guérin, M. Dubois, Z. Fawal, D. Ivanov, L. Vidal and A. Hamwi, *Carbon*, 2008, **46**, 1010-1016.
- S.-S. Lee, S.-W. Jang, K. Park, E. C. Jang, J.-Y. Kim, D. Neuhauser and S. Lee, *The Journal of Physical Chemistry C*, 2013, **117**, 5407-5415.
- W. Zhang, M. Dubois, K. Guérin, P. Bonnet, H. Kharbache, F. Masin, P. Thomas, J. Mansot and A. Hamwi, *The European Physical Journal B*, 2010, **75**, 133-139.
- W. Zhang, M. Dubois, K. Guérin, A. Hamwi, J. Giraudet and F. Masin, *J. Solid State Chem.*, 2008, **181**, 1915-1924.
- Z. Wei, K. Guérin, M. Dubois, H. Axel, F. Masin and A. Hamwi, *Carbon*, 2008, **46**, 1017-1024.
- S. Jiang, P. Huang, J. Lu and Z. Liu, *RSC Adv.*, 2021, **11**, 25461-25470.
- A. Hamwi, M. Daoud and J. Cousseins, *Synth. Met.*, 1988, **26**, 89-98.
- R. Yazami, P. Hany, P. Masset and A. Hamwi, *Mol. Cryst. Liq. Cryst. Sci. Technol., Sect. A*, 1998, **310**, 397-402.
- C. Delabarre, K. Guérin, M. Dubois, J. Giraudet, Z. Fawal and A. Hamwi, *J. Fluorine Chem.*, 2005, **126**, 1078-1087.
- C. Delabarre, M. Dubois, J. Giraudet, K. Guerin, R. Yazami and A. Hamwi, *Ecs Trans.*, 2007, **3**, 153-163.
- T. Nakajima, M. Kawaguchi and N. Watanabe, *Electrochimica Acta*, 1982, **27**, 1535-1538.
- N. O. V. Plank, L. Jiang and R. Cheung, *Applied Physics Letters*, 2003, **83**, 2426-2428.
- K. K. C. Ho, A. F. Lee and A. Bismarck, *Carbon*, 2007, **45**, 775-784.
- K. K. C. Ho, A. F. Lee, S. Lamoriniere and A. Bismarck, *Composites Part A: Applied Science and Manufacturing*, 2008, **39**, 364-373.
- Z. Wang, J. Wang, Z. Li, P. Gong, X. Liu, L. Zhang, J. Ren, H. Wang and S. Yang, *Carbon*, 2012, **50**, 5403-5410.
- Jeffrey A. Read and Wishvender K. Behl, *Electrochem. Solid-State Lett.*, 2009, **12**, A16-A18.
- Y. Matsuo, S. Hirata and M. Dubois, *J. Fluorine Chem.*, 2016, **185**, 36-41.
